# Supplementary material for: “FeV-cofactor”-inspired bionic Fe-doped BiVO4photocatalyst decorated with few-layer 2D black phosphorus for efficient nitrogen reduction
Source: Royal Society of Chemistry journal article supplement (doi:10.1039/d3qi00895a), 2023-01-01
Supplement: d3qi00895a1.pdf [file d3qi00895a1.pdf]

# **“FeV–cofactor”–inspired bionic Fe–doped BiVO<sub>4</sub> photocatalyst decorated with few layer 2D black phosphorus for efficient nitrogen reduction**

Hongda Li,<sup>a,c</sup> Shuai Jian,<sup>a</sup> Boran Tao,<sup>a,c</sup> Guoxiao Xu,<sup>a</sup> Baosheng Liu,<sup>a</sup> Shaonan Gu,<sup>b,\*</sup> Guofu Wang,<sup>a,\*</sup> Haixin Chang<sup>c,\*</sup>

<sup>a</sup> Liuzhou key laboratory for new energy vehicle power lithium battery, School of Electronic Engineering, Guangxi University of Science and Technology, Liuzhou, 545006, China

<sup>b</sup> Key Laboratory of Fine Chemicals in Universities of Shandong, Jinan Engineering Laboratory for Multi–Scale Functional Materials, School of Chemistry and Chemical Engineering, Qilu University of Technology (Shandong Academy of Sciences), Jinan 250353, China

<sup>c</sup> Quantum–Nano Matter and Device Lab, State Key Laboratory of Material Processing and Die & Mould Technology, School of Materials Science and Engineering, Huazhong University of Science and Technology, Wuhan 430074, China

**Corresponding authors:** hxchang@hust.edu.cn (Haixin Chang); sngu@qlu.edu.cn (Shaonan Gu); gfwang@guet.edu.cn (Guofu Wang)

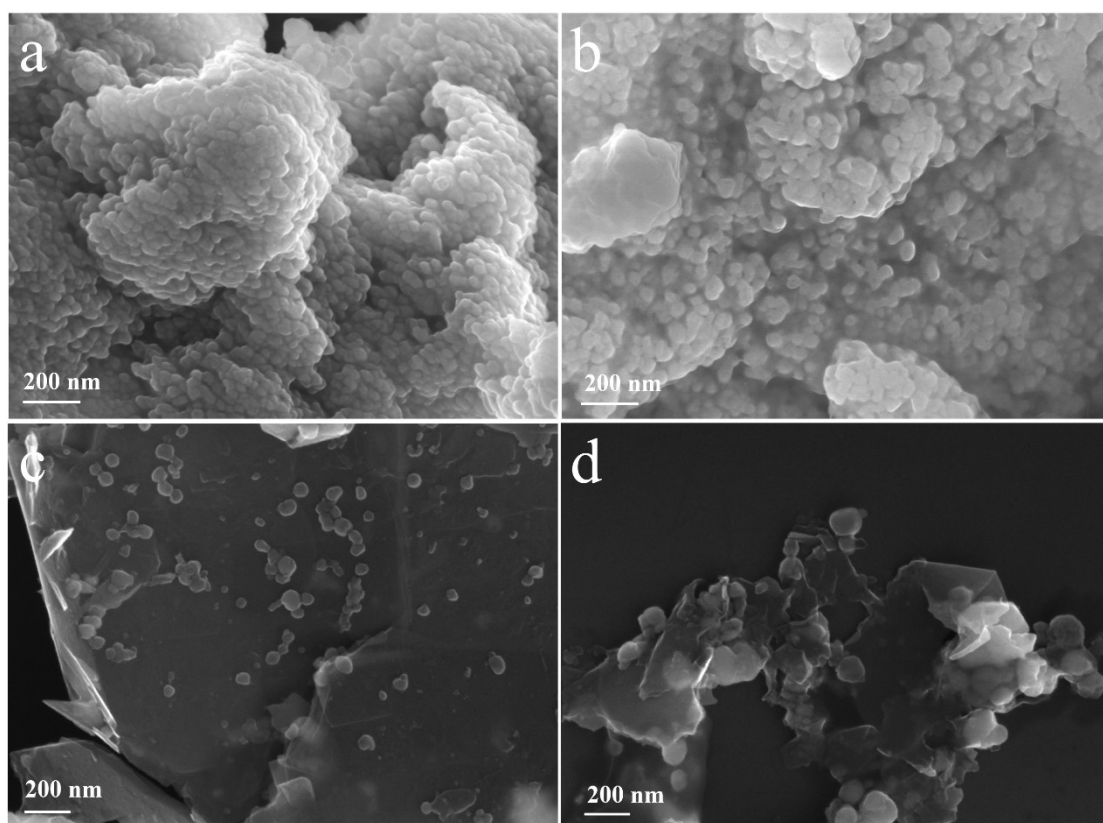

**Figure S1.** SEM images of (a)  $\text{BiVO}_4$ , (b)  $\text{FeBiVO}_4$ , (c)  $\text{FeBiVO}_4\text{-0.05BP}$  and (d)  $\text{BiVO}_4\text{-0.05BP}$ .

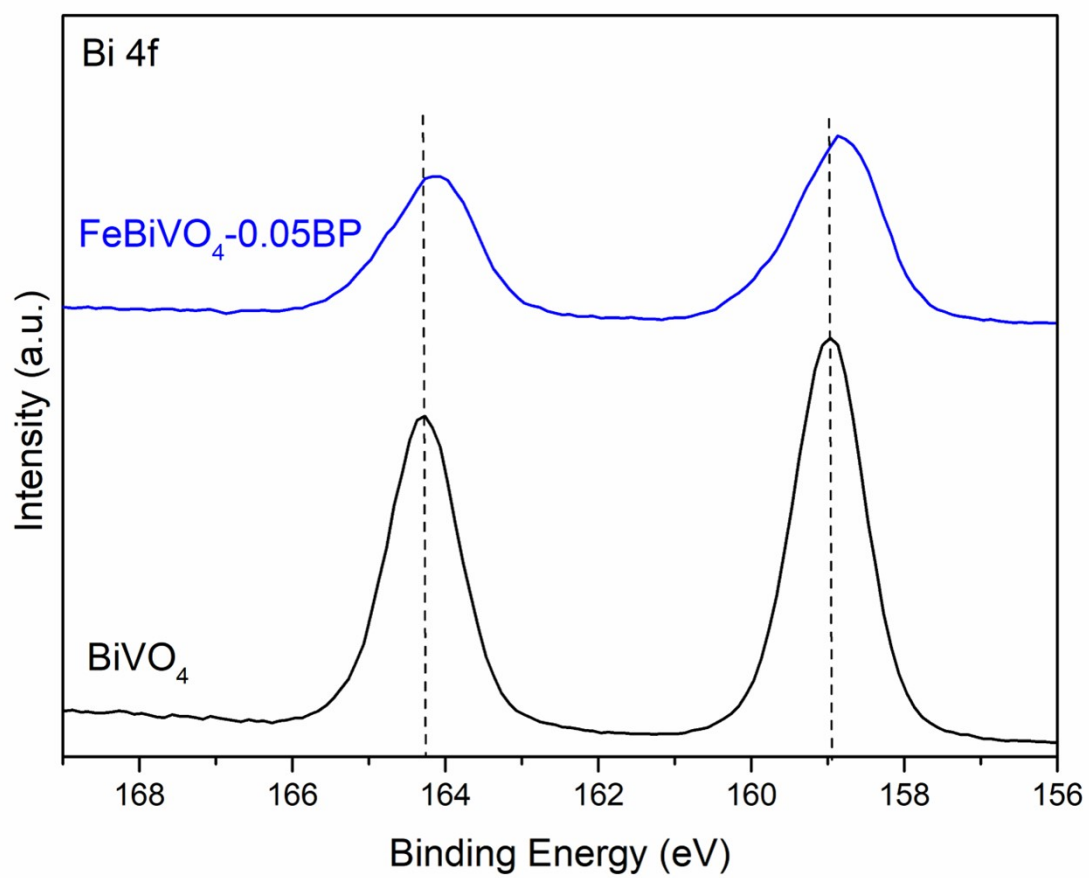

**Figure S2.** High-resolution XPS of Bi 4*f* for BiVO<sub>4</sub> and FeBiVO<sub>4</sub>-0.05BP.

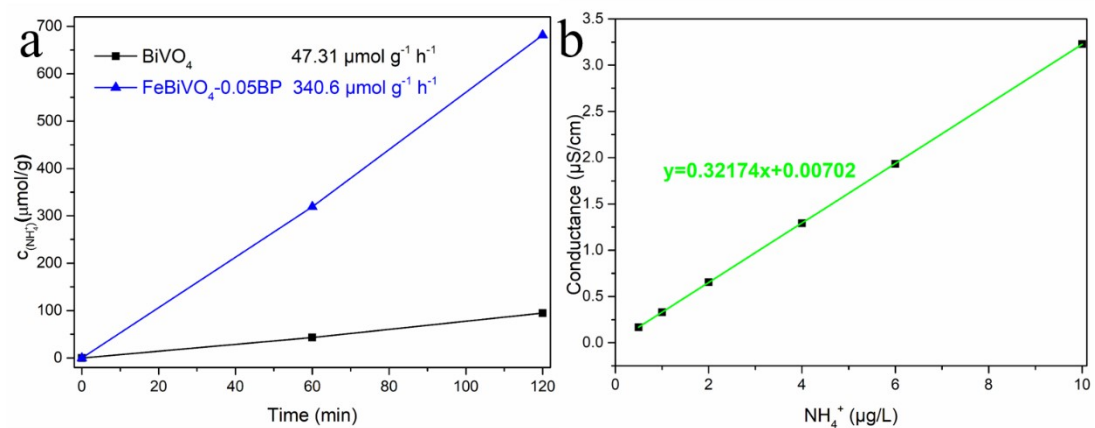

**Figure S3.** The  $\text{NH}_4^+$  amount detected by cation exchange chromatography: (a) photocatalytic  $\text{N}_2$  reduction of  $\text{BiVO}_4$  and  $\text{FeBiVO}_4\text{-0.05BP}$  under visible light irradiation; (b) the standard curve.

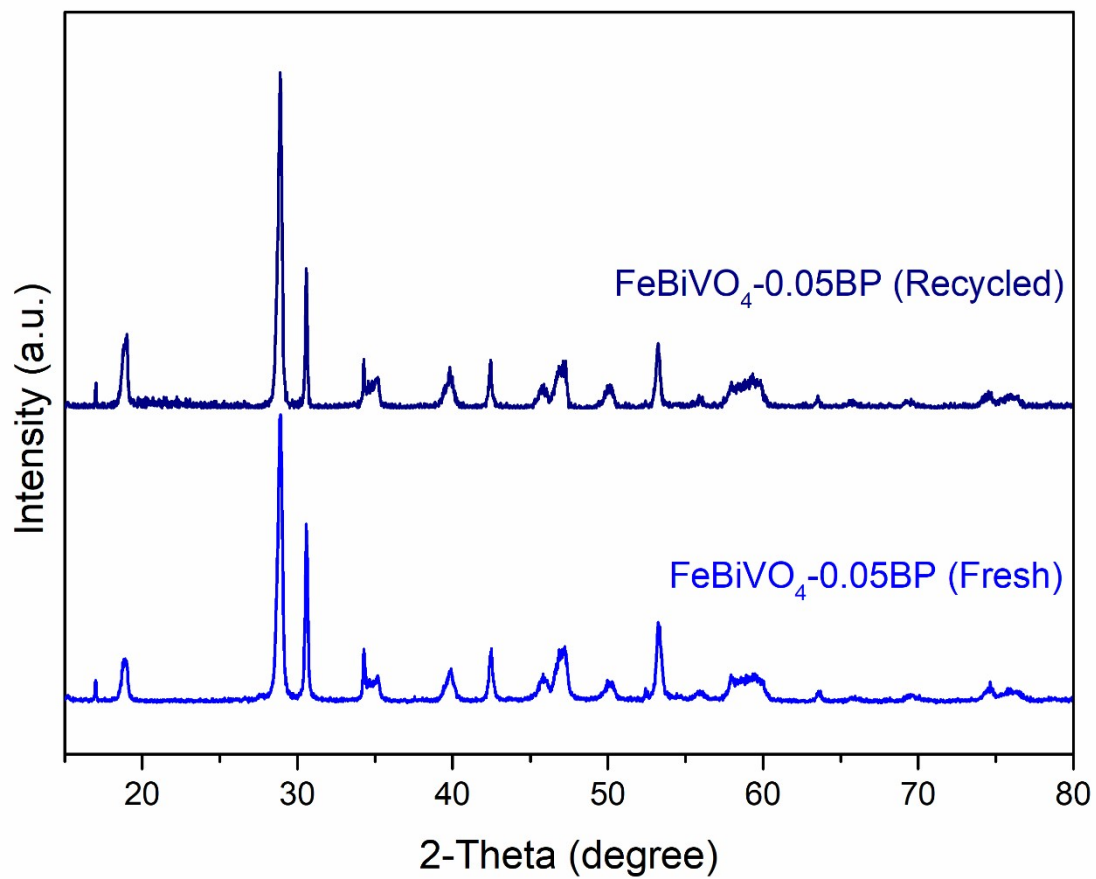

**Figure S4.** XRD patterns of fresh and recycled FeBiVO<sub>4</sub>-0.05BP.

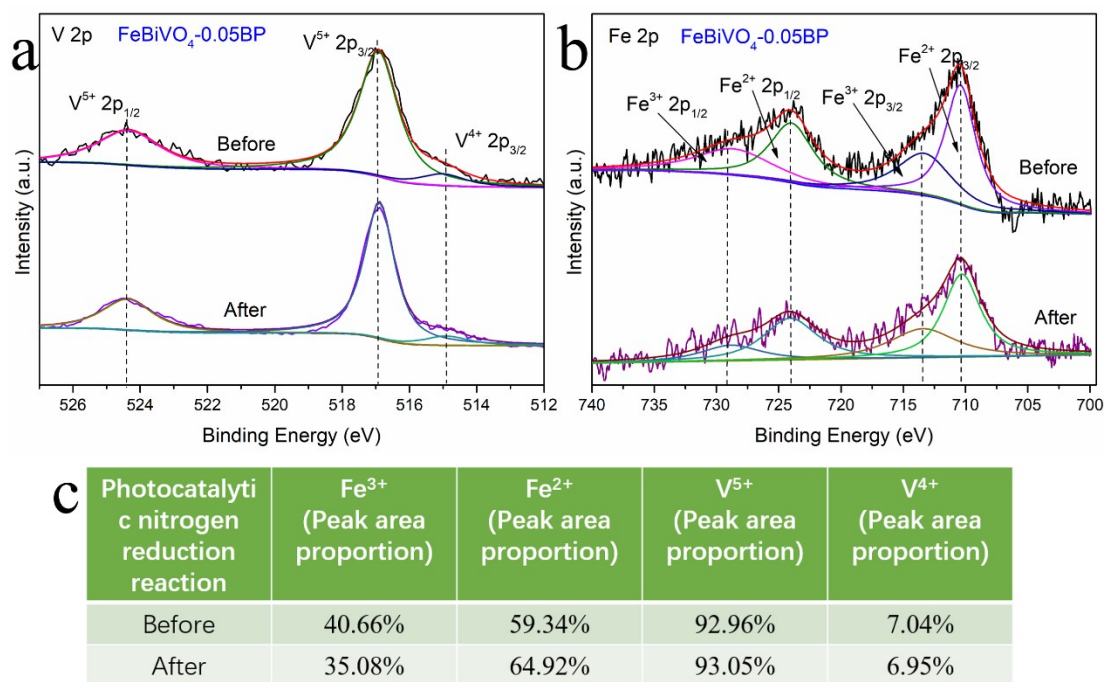

**Figure S5.** Changes of XPS before and after photocatalytic nitrogen reduction reaction: (a) V 2p and (b) Fe 2p; (c) summary of changes in XPS peak areas. There are almost no changes in the valence states of V element, while the number of Fe<sup>2+</sup> becomes more after photocatalytic nitrogen reduction reaction. This may be due to the presence of electron transfer between redox couples (V<sup>5+</sup>/V<sup>4+</sup> and Fe<sup>3+</sup>/Fe<sup>2+</sup>) during photocatalytic nitrogen reduction, and the need to reduce part of Fe<sup>3+</sup> needs to be reduced to Fe<sup>2+</sup>, thus achieving the redox regulation equilibrium of V<sup>5+</sup>/V<sup>4+</sup> and Fe<sup>3+</sup>/Fe<sup>2+</sup> and the valence equilibrium between Fe and V ions.

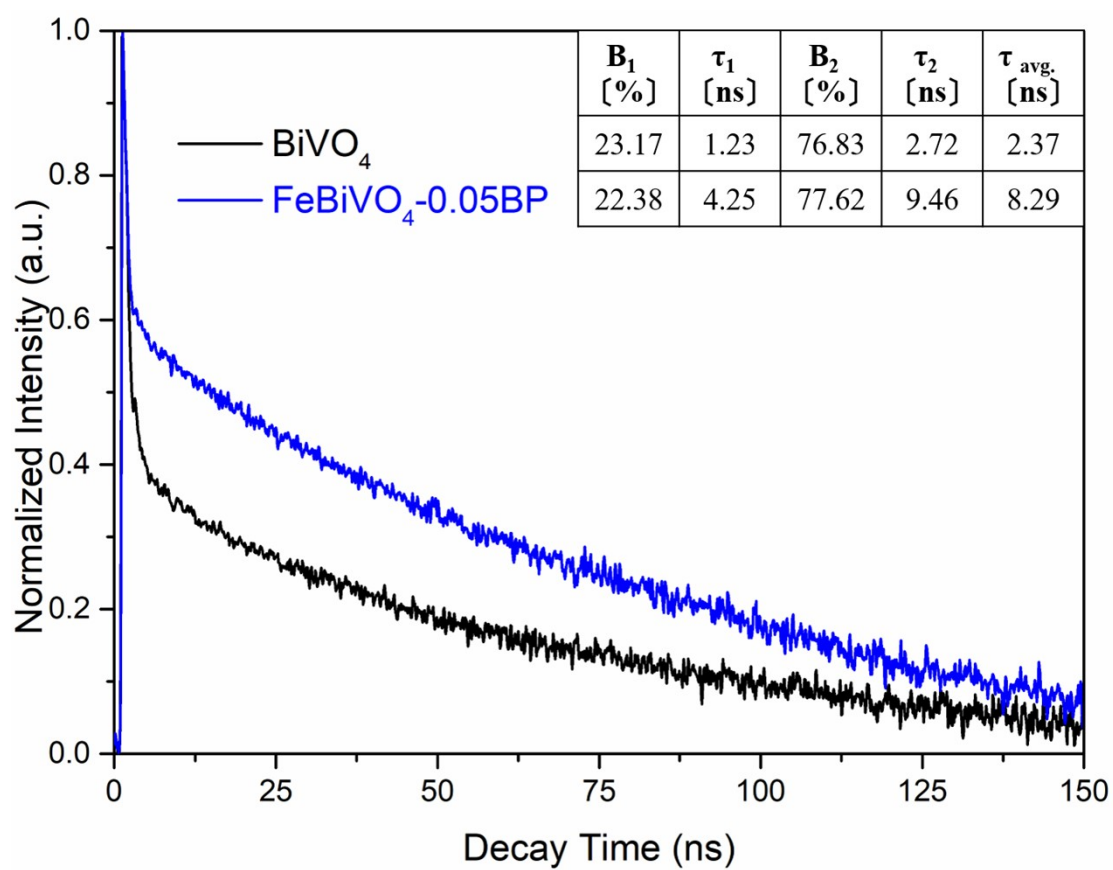

**Figure S6.** Time-resolved fluorescence decay spectra of BiVO<sub>4</sub> and FeBiVO<sub>4</sub>-0.05BP.

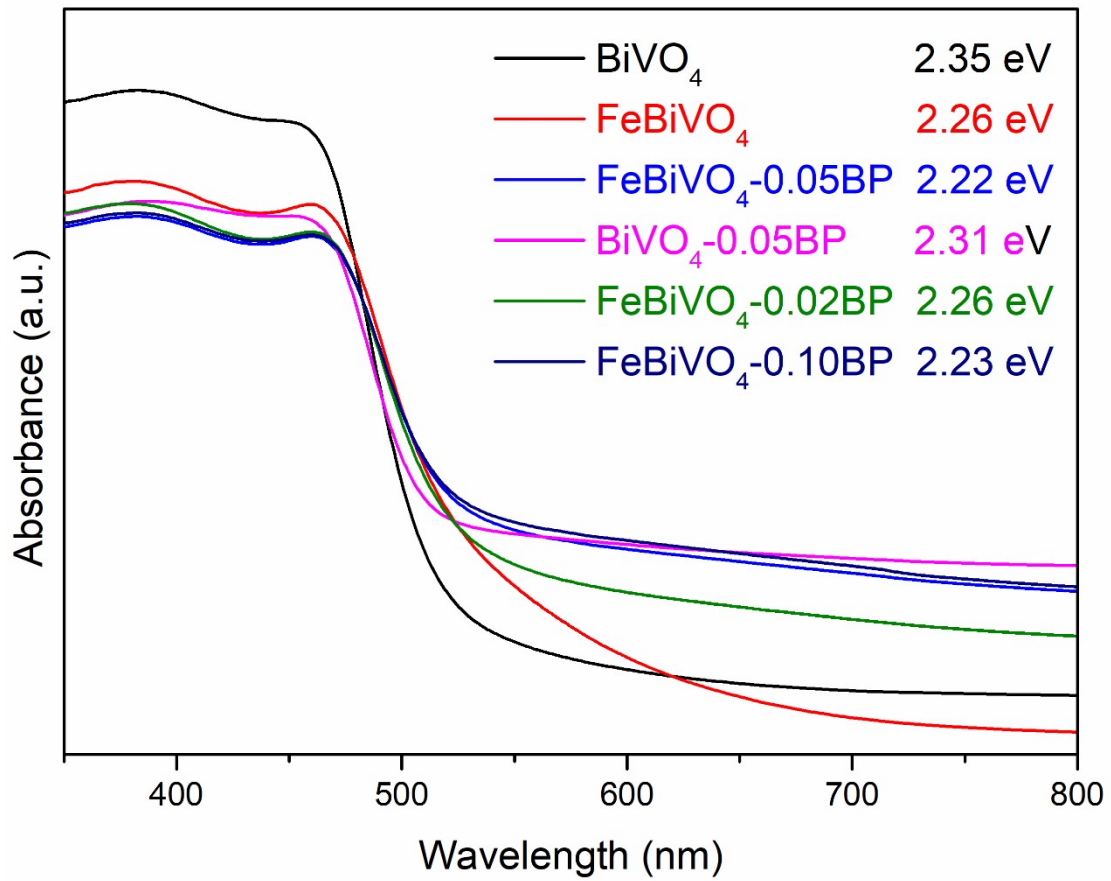

**Figure S7.** UV-vis diffuse reflectance spectra of  $\text{BiVO}_4$ ,  $\text{FeBiVO}_4$ ,  $\text{BiVO}_4\text{-0.05BP}$ ,  $\text{FeBiVO}_4\text{-0.05BP}$ ,  $\text{FeBiVO}_4\text{-0.02BP}$  and  $\text{FeBiVO}_4\text{-0.10BP}$ .



### Text S1

The corresponding equations (Eq. (3-10)) for the change in Gibbs free energy are as following:

$$\Delta G_1 = G(*NN) - G(*) - G(N_2)\#(S1)$$

$$\Delta G_2 = G(*NNH) - G(*NN) - G(H)\#(S2)$$

$$\Delta G_3 = G(*NNH_2) - G(*NNH) - G(H)\#(S3)$$

$$\Delta G_4 = G(*NNH_3) - G(*NNH_2) - G(H)\#(S4)$$

$$\Delta G_5 = G(*NH) + G(NH_3) - G(*NNH_3) - G(H)\#(S5)$$

$$\Delta G_6 = G(*NH_2) - G(*NH) - G(H)\#(S6)$$

$$\Delta G_7 = G(*NH_3) - G(*NH_2) - G(H)\#(S7)$$

$$\Delta G_8 = G(*) + G(NH_3) - G(*NH_3)\#(S7)$$

**Table S1.** Unit cell parameters of BiVO<sub>4</sub> and FeBiVO<sub>4</sub>.

| <b>Samples</b>            | <b>Crystal Vol (Å<sup>3</sup>)</b> | <b>Lattice Parameters</b> |              |              |
|---------------------------|------------------------------------|---------------------------|--------------|--------------|
|                           |                                    | <b>a (Å)</b>              | <b>b (Å)</b> | <b>c (Å)</b> |
| <b>BiVO<sub>4</sub></b>   | 310.27                             | 5.197                     | 11.700       | 5.103        |
| <b>FeBiVO<sub>4</sub></b> | 308.98                             | 5.182                     | 11.690       | 5.101        |

**Table S2.** Element concentrations (ICP-OES) and BET specific surface areas of BiVO<sub>4</sub>, FeBiVO<sub>4</sub>, FeBiVO<sub>4</sub>-0.05BP and BiVO<sub>4</sub>-0.05BP.

| <b>Samples</b>                                      | <b>BiVO<sub>4</sub></b> | <b>FeBiVO<sub>4</sub></b> | <b>FeBiVO<sub>4</sub>-0.05BP</b> | <b>BiVO<sub>4</sub>-0.05BP</b> |
|-----------------------------------------------------|-------------------------|---------------------------|----------------------------------|--------------------------------|
| <b>Surface areas (m<sup>2</sup> g<sup>-1</sup>)</b> | 35.23                   | 34.19                     | 51.84                            | 49.98                          |
| <b>Bi (ppm)</b>                                     | 284.6                   | 296.9                     | 274.3                            | 286.7                          |
| <b>Fe (ppm)</b>                                     | /                       | 1.554                     | 1.442                            | /                              |
| <b>V (ppm)</b>                                      | 68.81                   | 74.63                     | 66.79                            | 69.41                          |
| <b>P (ppm)</b>                                      | /                       | /                         | 15.37                            | 16.51                          |
| <b>Theoretical Fe/Bi (mol%)</b>                     | /                       | 2.00                      | 2.00                             | /                              |
| <b>Real Fe/Bi (mol%)</b>                            | /                       | 1.95                      | 1.96                             | /                              |
| <b>Theoretical P (wt.%)</b>                         | /                       | /                         | 5.00                             | 5.00                           |
| <b>Real P (wt.%)</b>                                | /                       | /                         | 4.29                             | 4.43                           |

**Table S3.** Photocatalytic nitrogen fixation performance of different catalysts under various reaction conditions.

| <b>Catalysts</b>                                     | <b>Scavenger</b> | <b>Light Source</b>     | <b>NH<sub>3</sub> generation rate<br/>μmol g<sup>-1</sup> h<sup>-1</sup></b> | <b>Reference</b> |
|------------------------------------------------------|------------------|-------------------------|------------------------------------------------------------------------------|------------------|
| <b>BiVO<sub>4</sub></b>                              | None             | 300 W Xe lamp, λ>400 nm | 103.4                                                                        | S1               |
| <b>Porous C-TiO<sub>2</sub></b>                      | None             | 300 W Xe lamp, λ>395 nm | 109.3                                                                        | S2               |
| <b>Fe-W<sub>18</sub>O<sub>49</sub>-BP</b>            | None             | 500 W Xe lamp           | 187.6                                                                        | S3               |
| <b>Ni<sub>2</sub>P-BP</b>                            | Methanol         | 300 W Xe lamp           | 6.14                                                                         | S4               |
| <b>Defect-rich<br/>Bi<sub>3</sub>O<sub>4</sub>Br</b> | None             | 300 W Xe lamp           | 50.4                                                                         | S5               |
| <b>F capped TiO<sub>2</sub></b>                      | None             | 300 W Xe lamp           | 206                                                                          | S6               |
| <b>Bi<sub>2</sub>WO<sub>6</sub>-BP</b>               | None             | 300 W Xe lamp           | 73.6                                                                         | S7               |
| <b>Gd-Bi<sub>2</sub>MoO<sub>6</sub></b>              | None             | 300 W Xe lamp, λ>420 nm | 300.15                                                                       | S8               |
| <b>CdS/WO<sub>3</sub></b>                            | None             | 300 W Xe lamp           | 35.8                                                                         | S9               |
| <b>FeBiVO<sub>4</sub>-0.05BP</b>                     | None             | 300 W Xe lamp, λ>420 nm | 337.9                                                                        | This work        |

## References

- [S1] G. Zhang, Y. Meng, B. Xie, Z. Ni, H. Lu, S. Xia, Precise location and regulation of active sites for highly efficient photocatalytic synthesis of ammonia by facet-dependent BiVO<sub>4</sub> single crystals, *Appl. Catal. B: Environ.* 2021, 296, 120379.
- [S2] Q. Han, C. Wu, H. Jiao, R. Xu, Y. Wang, J. Xie, Q. Guo, J. Tang, Rational Design of High-Concentration Ti<sup>3+</sup> in Porous Carbon-Doped TiO<sub>2</sub> Nanosheets for Efficient Photocatalytic Ammonia Synthesis, *Adv. Mater.* 2021, 33, 2008180.
- [S3] G. Dong, X. Huang, Y. Bi, Anchoring Black Phosphorus Quantum Dots on Fe-Doped W<sub>18</sub>O<sub>49</sub> Nanowires for Efficient Photocatalytic Nitrogen Fixation, *Angew. Chem. Int. Edit.* 2022, 61, e202204271.
- [S4] Z.-K. Shen, M. Cheng, Y.-J. Yuan, L. Pei, J. Zhong, J. Guan, X. Li, Z.-J. Li, L. Bao, X. Zhang, Z.-T. Yu, Z. Zou, Identifying the role of interface chemical bonds in activating charge transfer for enhanced photocatalytic nitrogen fixation of Ni<sub>2</sub>P-black phosphorus photocatalysts, *Appl. Catal. B: Environ.* 2021, 295, 120274.
- [S5] J. Di, J.X. Xia, M. F. Chisholm, J. Zhong, C. Chen, X. Z. Cao, F. Dong, Z. Chi, H.L. Chen, Y. X. Weng, J. Xiong, S. Z. Yang, H. M. Li, Z. Liu, S. Dai, Defect-tailoring mediated electron-hole separation in single unit cell Bi<sub>3</sub>O<sub>4</sub>Br nanosheets for boosting photocatalytic hydrogen evolution and nitrogen fixation, *Adv. Mater.* 2019, 31, 1807576.
- [S6] R. Guan, D. Wang, Y. Zhang, C. Liu, W. Xu, J. Wang, Z. Zhao, M. Feng, Q. Shang, Z. Sun, Enhanced photocatalytic N<sub>2</sub> fixation via defective and fluoride modified TiO<sub>2</sub> surface. *Appl. Catal. B: Environ.* 2021, 282, 119580.
- [S7] L. Liu, J. Liu, K. Sun, J. Wan, F. Fu, J. Fan, Novel phosphorus-doped Bi<sub>2</sub>WO<sub>6</sub> monolayer with oxygen vacancies for superior photocatalytic water detoxication and nitrogen fixation performance, *Chem. Eng. J.* 2021, 411, 128629.
- [S8] H. Li, H. Zhao, C. Li, B. Li, B. Tao, S. Gu, G. Wang, H. Chang, Redox regulation of photocatalytic nitrogen reduction reaction by gadolinium doping in two-dimensional bismuth molybdate nanosheets, *Appl. Surf. Sci.* 2022, 600, 154105.
- [S9] P. Xia, X. Pan, S. Jiang, J. Yu, B. He, P. M. Ismail, W. Bai, J. Yang, L. Yang, H. Zhang, M. Cheng, H. Li, Q. Zhang, C. Xiao, Y. Xie, Designing a Redox Heterojunction for Photocatalytic

“Overall Nitrogen Fixation” under Mild Conditions, *Adv. Mater.* 2022, 34, 2200563.
